# Supplementary figures and images for: Identifying Cancer Drivers Using DRIVE: A Feature-Based Machine Learning Model for a Pan-Cancer Assessment of Somatic Missense Mutations
Source: MDPI journal article supplement (doi:10.3390/cancers13112779), 2021-06-03

**Overview of the computational workflow**

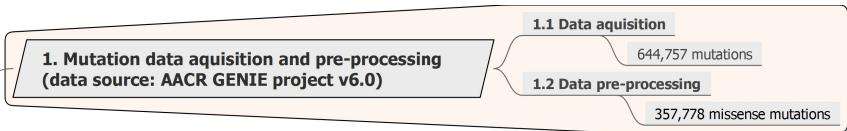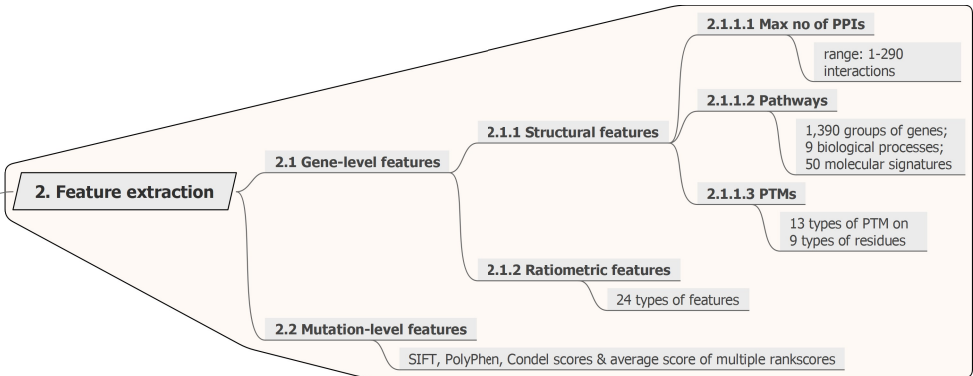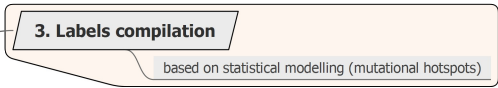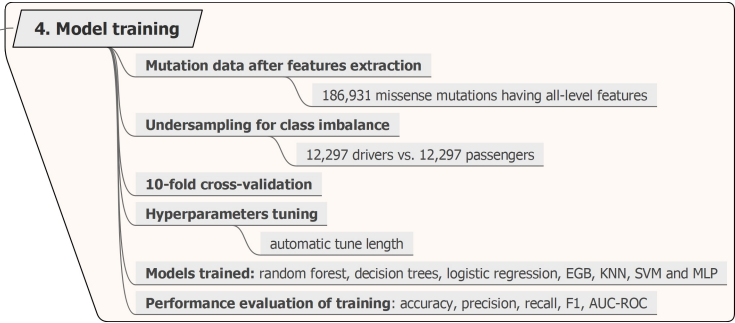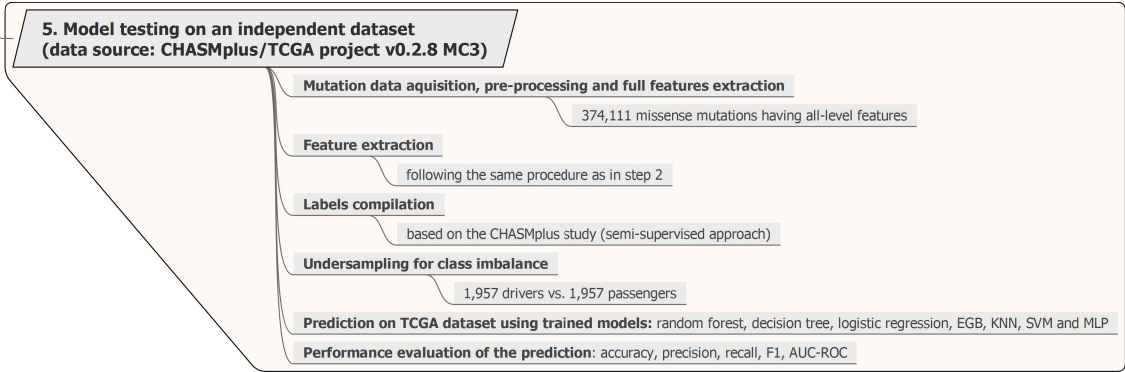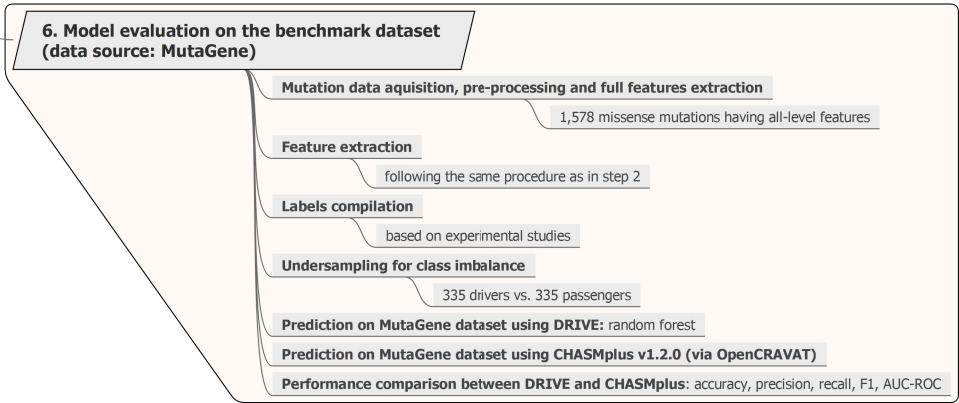

Supplement: s1 [file s1]
